# Supplementary material
Source: PubMed Central journal article supplement (PMC5867234)

A

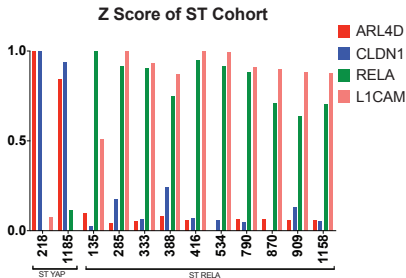

B

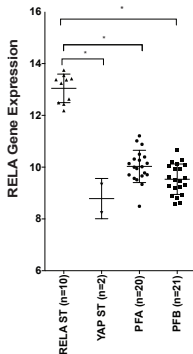

C

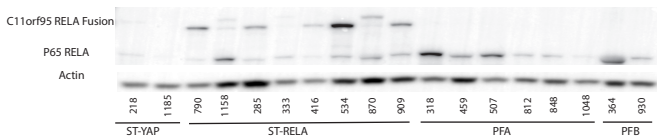

Supplement: NIHMS931489-supplement-Supp_FigS1.pdf [file NIHMS931489-supplement-Supp_FigS1.pdf]

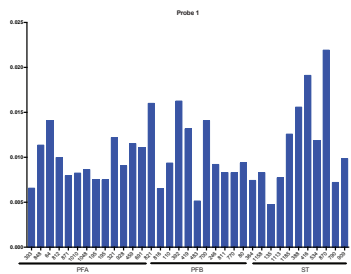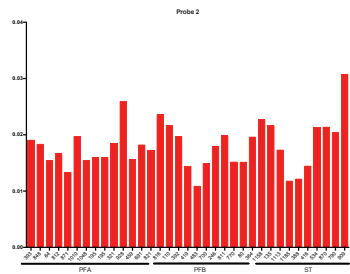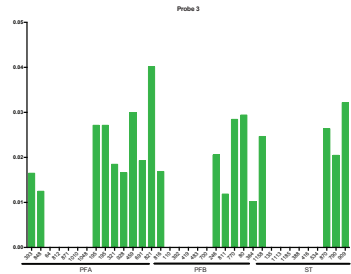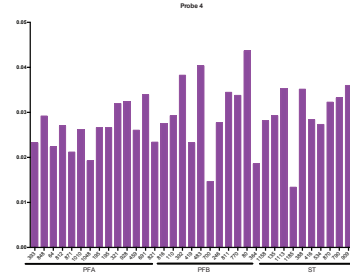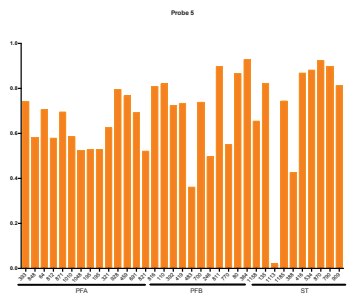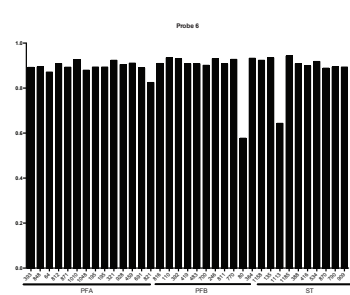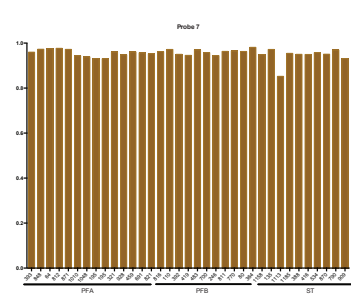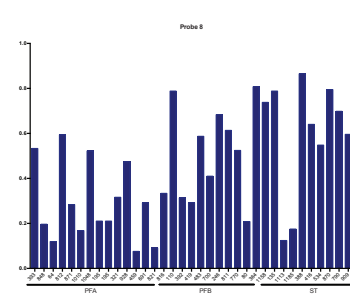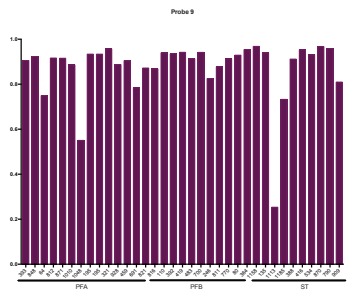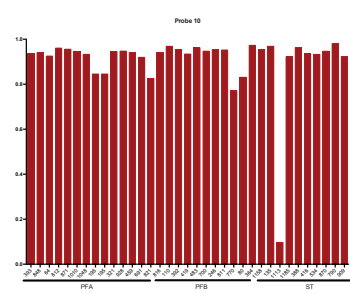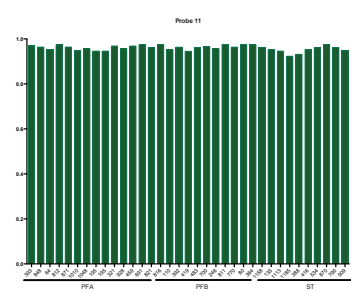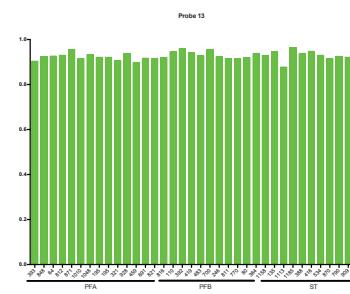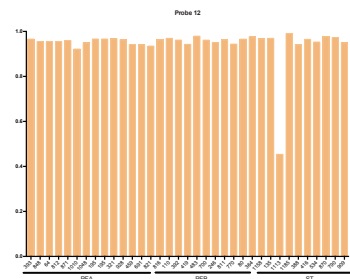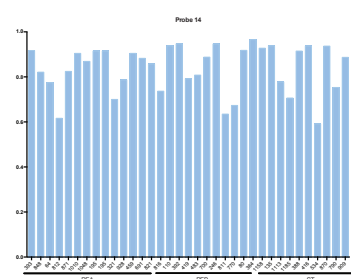

Supplement: NIHMS931489-supplement-Supp_FigS2.pdf [file NIHMS931489-supplement-Supp_FigS2.pdf]

# CD274 (PDL1) 227458\_at

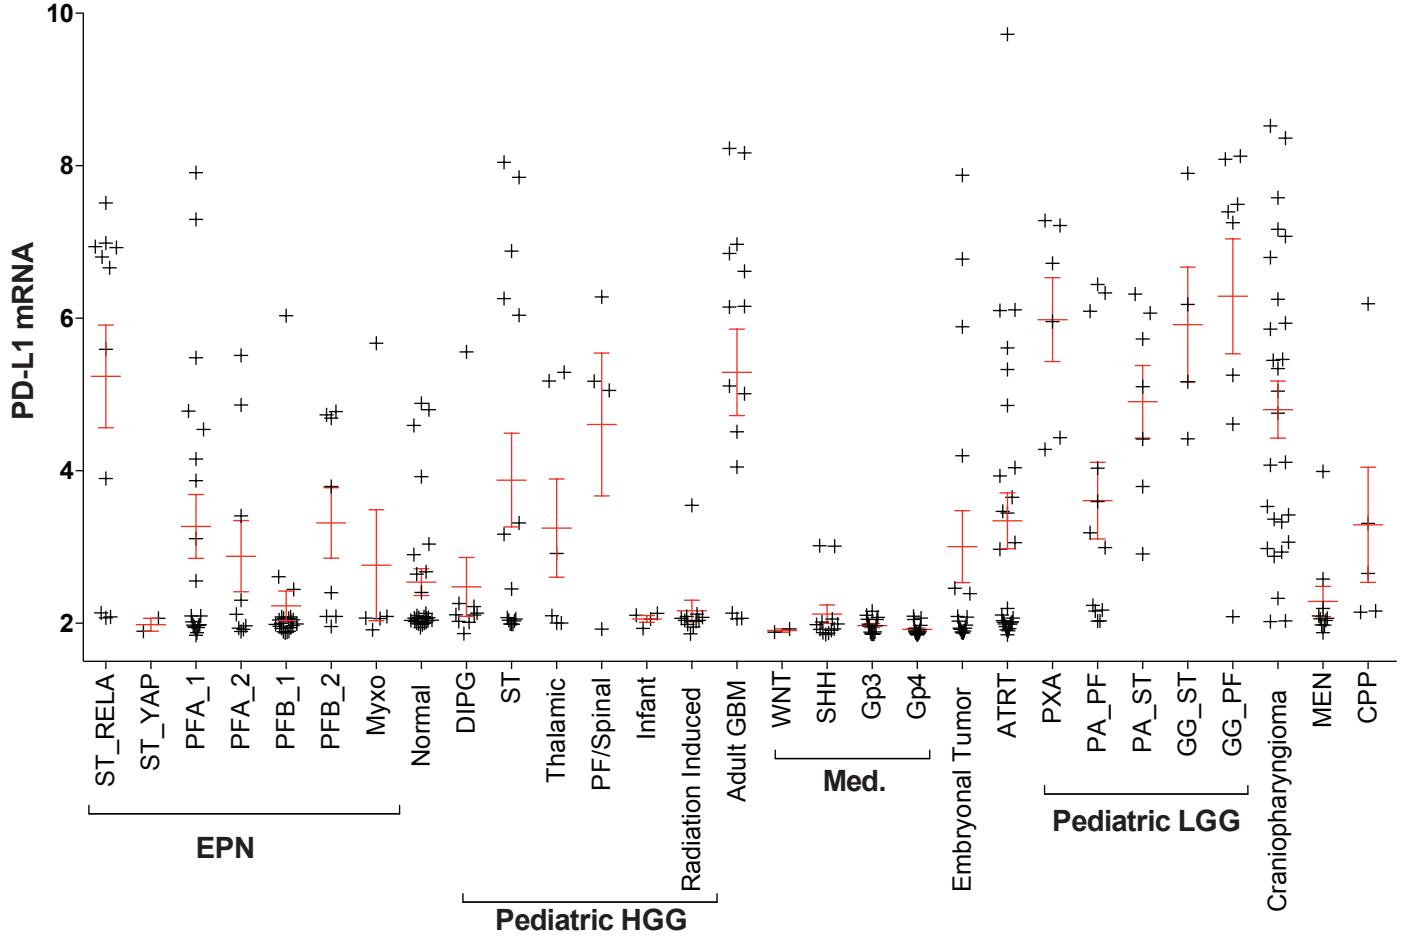

Supplement: NIHMS931489-supplement-Supp_FigS3.pdf [file NIHMS931489-supplement-Supp_FigS3.pdf]

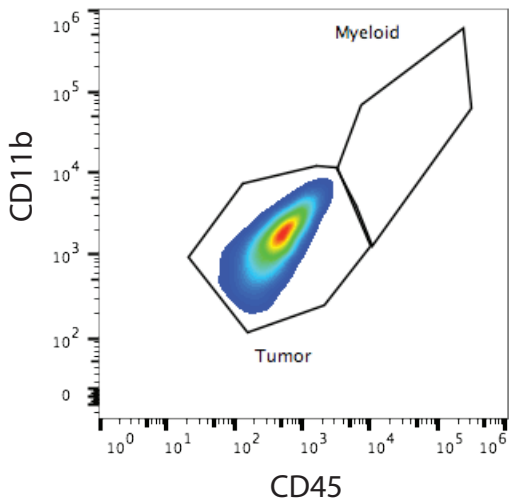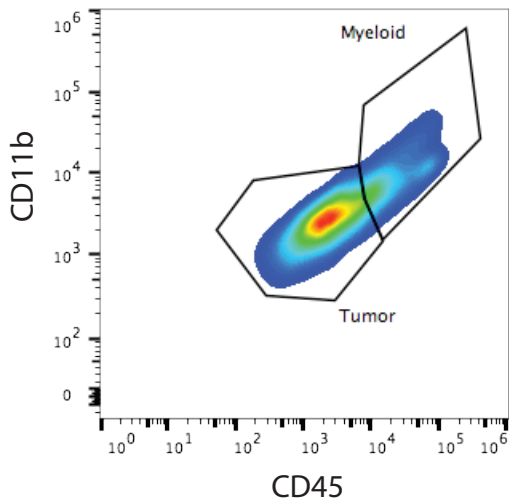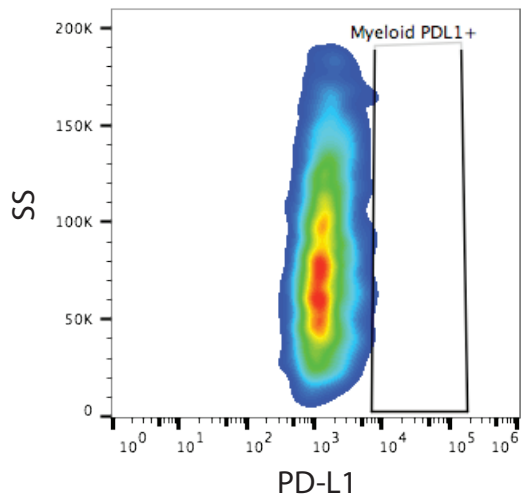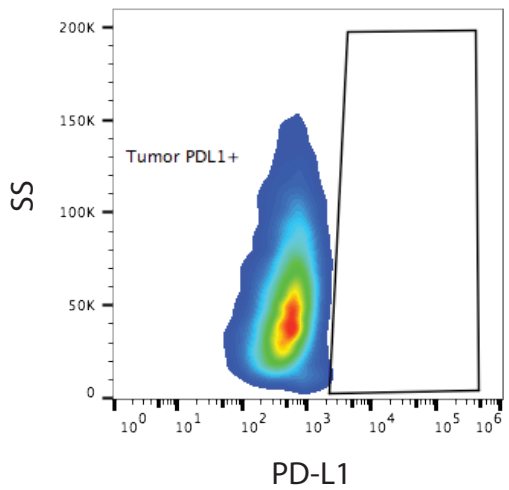

Supplement: NIHMS931489-supplement-Supp_FigS4.pdf [file NIHMS931489-supplement-Supp_FigS4.pdf]

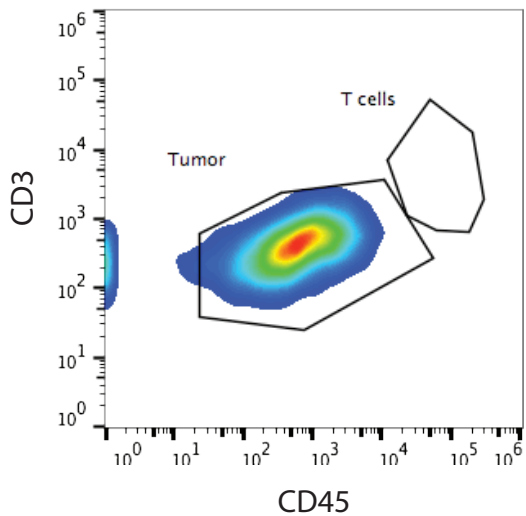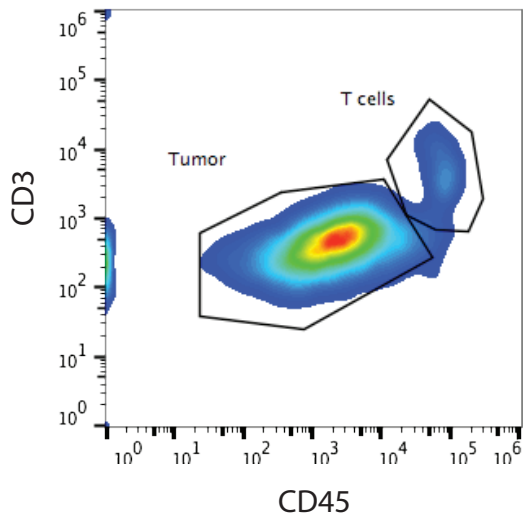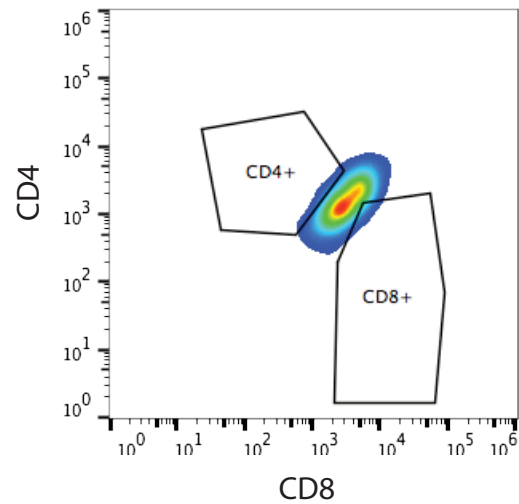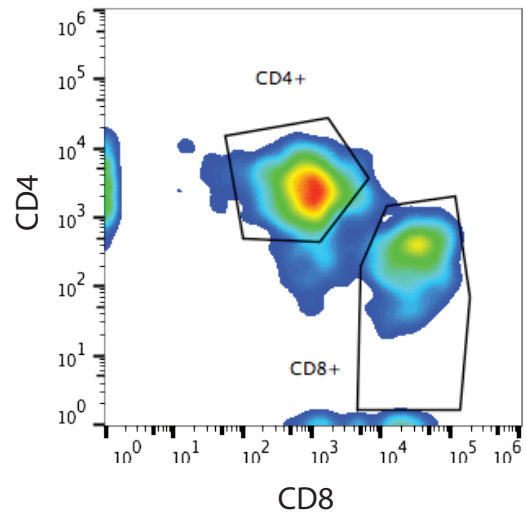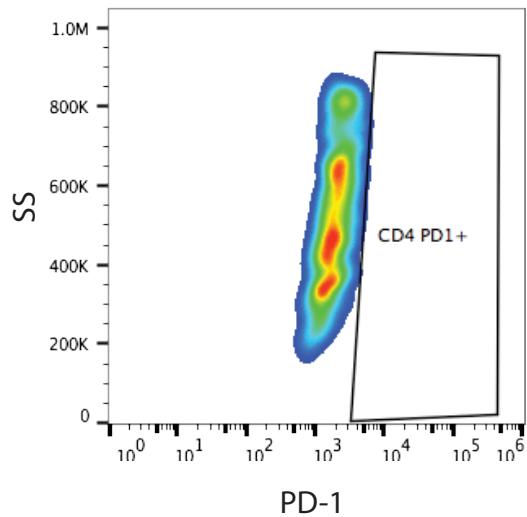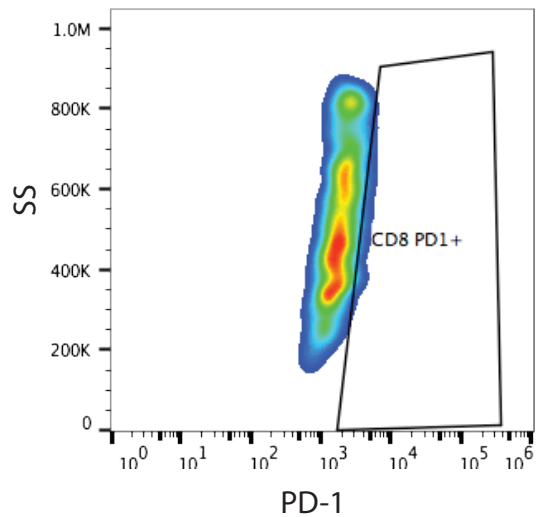

Supplement: NIHMS931489-supplement-Supp_FigS5.pdf [file NIHMS931489-supplement-Supp_FigS5.pdf]

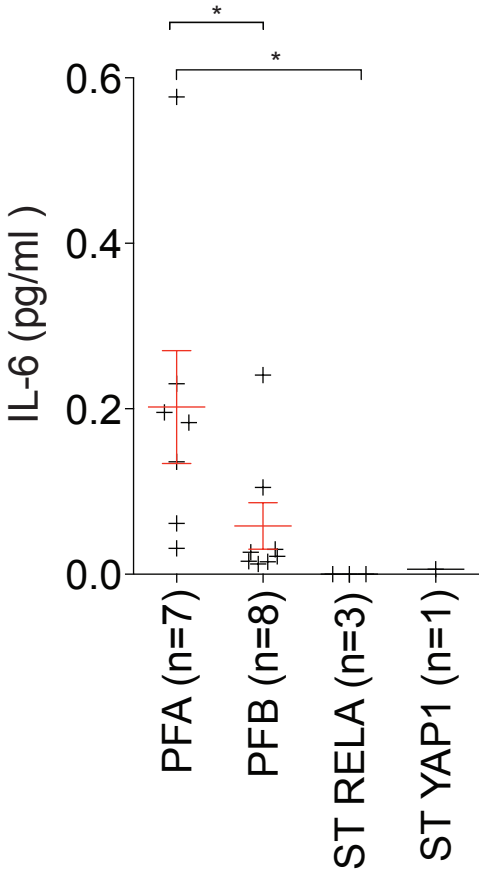

Supplement: NIHMS931489-supplement-Supp_FigS6.pdf [file NIHMS931489-supplement-Supp_FigS6.pdf]
